# Supplementary figures and images for: Genome-Wide Identification of Sucrose Transporter Genes and Functional Analysis of RsSUC1b in Radish (Raphanus sativus L.)
Source: MDPI journal article supplement (doi:10.3390/horticulturae8111058), 2022-11-10

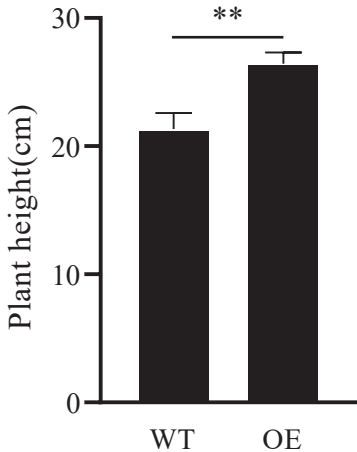

Supplement: s1 [file s1]

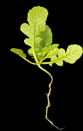

20d

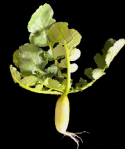

40d

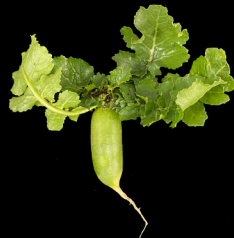

60d

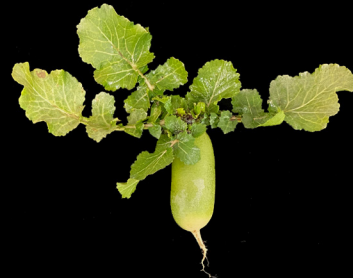

80d

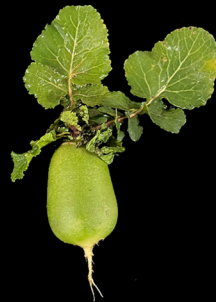

100d

10cm

Supplement: s1 [file s1]

WT

OE1

OE2

OE3

Internal control

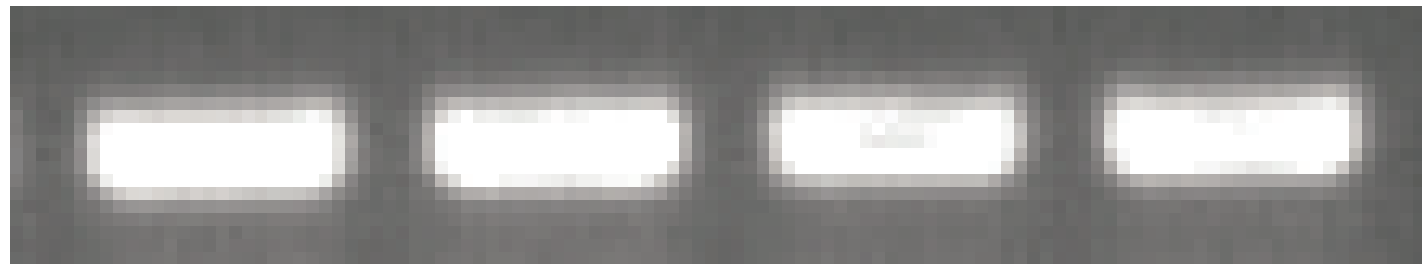

*RsSUC1b*

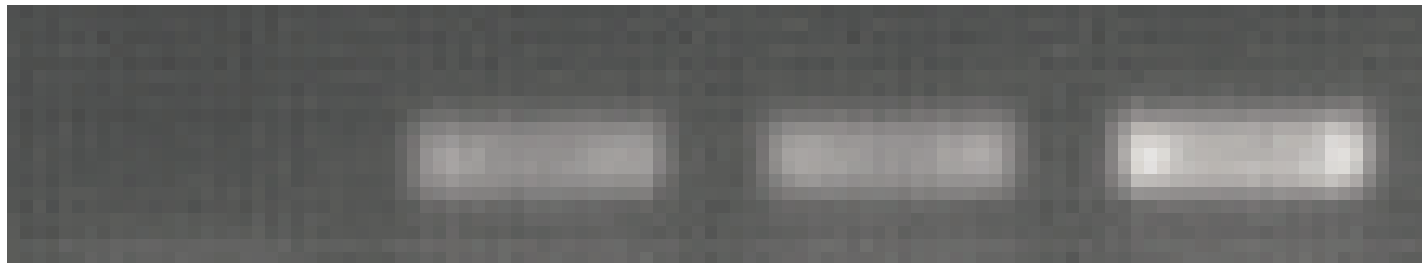

Supplement: s1 [file s1]
